# Supplementary material
Source: Royal Society of Chemistry journal article supplement (doi:10.1039/d6ce00105j)
Supplement: d6ce00105j1.pdf [file d6ce00105j1.pdf]

## Appendix A Supplementary data

### Construction of a $\text{Co}_2(\text{OH})_2\text{CO}_3@$ CoFe-LDH heterostructure on Ni foam with tunable interfacial properties for electrochemical applications

Qi Chen,<sup>a</sup> Hongwei Duan,<sup>a</sup> Yan Song, Yaning Guo,<sup>\*a</sup> Hongge Zhang,<sup>a</sup> Feng Zhang,<sup>a</sup> Xiaobin Hu,<sup>a</sup> and Yinfeng Han<sup>\*a</sup>

College of Chemistry and Material Engineering, Engineering Research Center of Advanced Ferroelectric Functional Materials, Baoji University of Arts and Sciences, Baoji, Shaanxi, China

\*Corresponding authors

E-mail: [ggyn1997@163.com](mailto:ggyn1997@163.com)

E-mail address: [hhanyinfeng@126.com](mailto:hhanyinfeng@126.com)

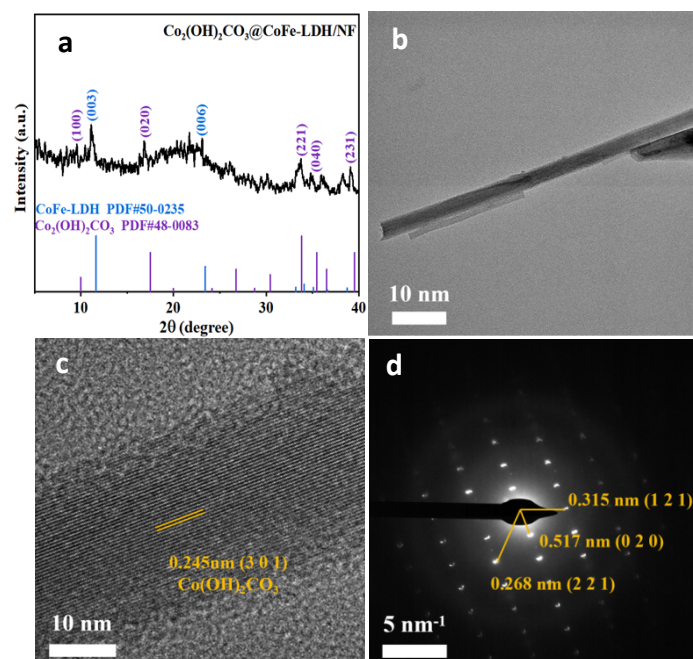

**Supplementary Fig. 1.** (a) XRD patterns of  $\text{Co}_2(\text{OH})_2\text{CO}_3@\text{CoFe-LDH/NF}$ ; (b) TEM image; (c) HRTEM image and (d) SAED pattern of the nanoneedle-dominated region.

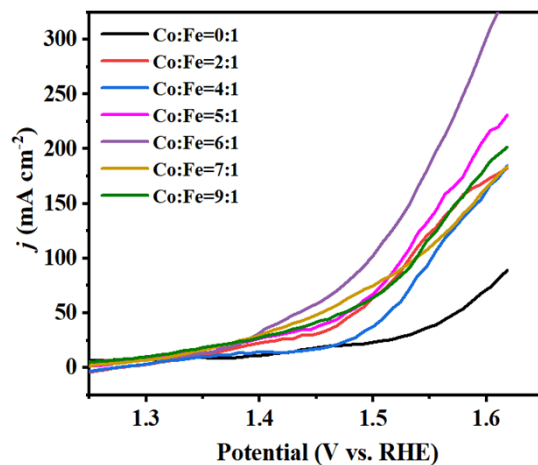

**Supplementary Fig. 2** LSV curves of synthetic catalysts with different metal ion ratios.

**Supplementary Table 1.** The overpotentials required to achieve a current density of  $50 \text{ mA}\cdot\text{cm}^{-2}$  for samples with different metal ion ratios

| $\text{Co}^{2+}:\text{Fe}^{3+}$<br>metal ion ratios | 0:1 | 2:1   | 4:1   | 5:1   | 6:1   | 7:1   | 9:1   |
|-----------------------------------------------------|-----|-------|-------|-------|-------|-------|-------|
| Overpotential (mV)                                  | 343 | 254.1 | 283.7 | 244.6 | 203.5 | 224.5 | 241.1 |

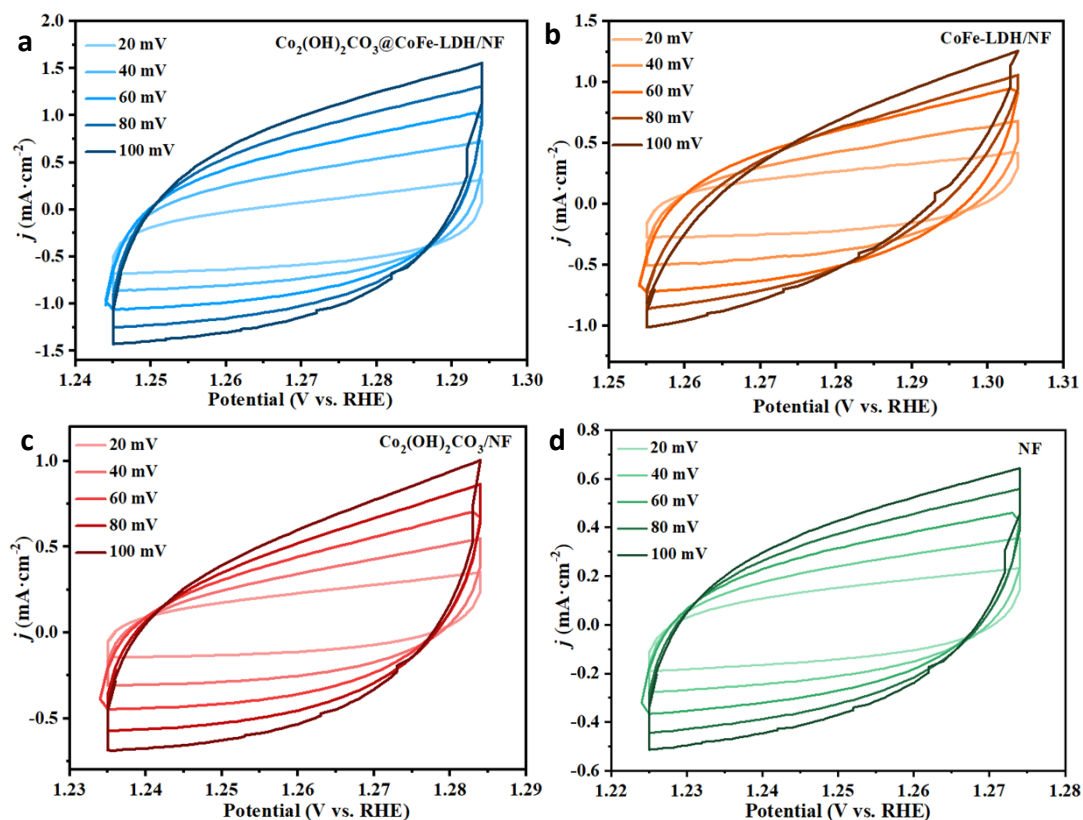

**Supplementary Fig. 3** Cyclic voltammograms at different scan rates for (a)  $\text{Co}_2(\text{OH})_2\text{CO}_3@\text{CoFe-LDH}/\text{NF}$ , (b)  $\text{CoFe-LDH}/\text{NF}$ , (c)  $\text{Co}_2(\text{OH})_2\text{CO}_3/\text{NF}$ , and (d)  $\text{NF}$ .

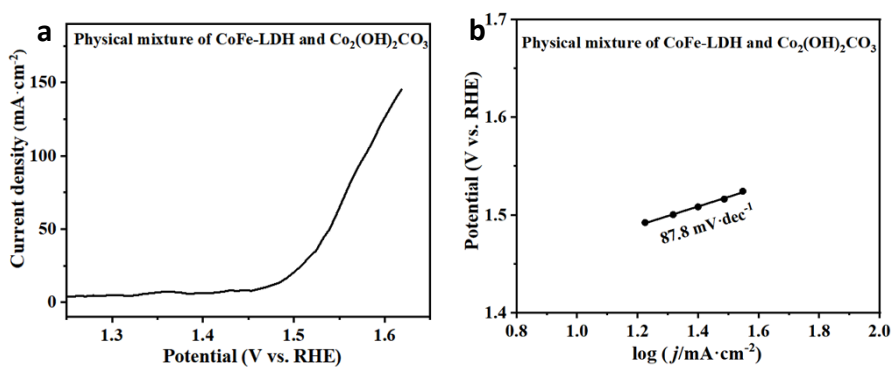

**Supplementary Fig. 4** (a) LSV curves and (b) the corresponding Tafel slope of the physical mixture of  $\text{CoFe-LDH}$  and  $\text{Co}_2(\text{OH})_2\text{CO}_3$ .

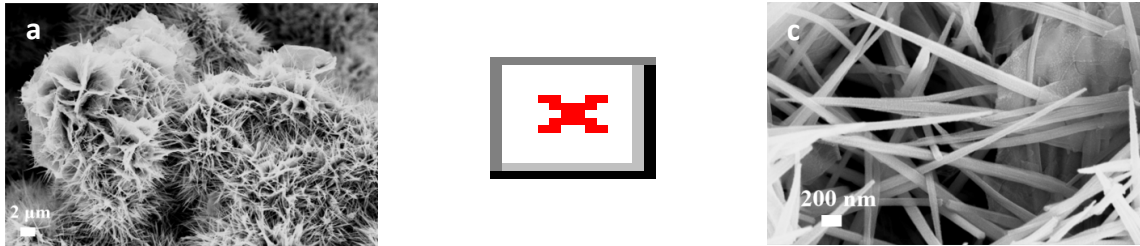

**Supplementary Fig. 5** (a-c) SEM images of the catalyst at different magnifications after the durability test

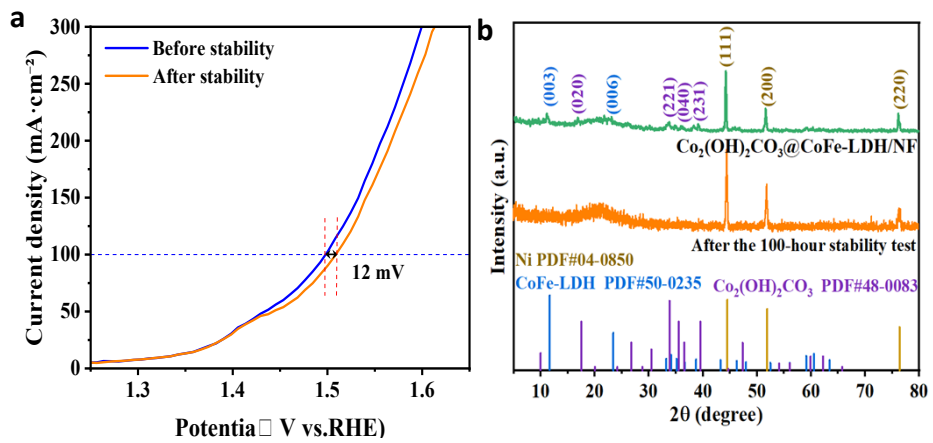

**Supplementary Fig. 6** comparison of (a) the LSV curves and (b) corresponding XRD patterns before and after the durability test.

**Supplementary Table 2.** Comparison of the OER performance of  $\text{Co}_2(\text{OH})_2\text{CO}_3$ @CoFe-LDH with previously reported CoFe-LDH based electrocatalysts

| Catalysts                                          | $\eta_{10}$ (mV) | $\eta_{50}$ (mV) | $\eta_{100}$ (mV) | Tafel slope (mV $\cdot$ dec $^{-1}$ ) | Ref       |
|----------------------------------------------------|------------------|------------------|-------------------|---------------------------------------|-----------|
| Ru, Ir@CoFe-LDH/IF                                 | -                | -                | 256               | 49.3                                  | [10]      |
| $\text{Ni}_{0.85}\text{Se}$ @CoFe LDH/NF nanosheet | 223              | -                | 280               | -                                     | [12]      |
| CoFe-LDH@NiSe                                      | 127              | 285              | -                 | 37                                    | [13]      |
| Mo-NiSe $_x$ /CoFe LDH                             | -                | -                | 200               | 77.3                                  | [14]      |
| MoS $_2$ /CoFe-LDH/NF nanosheet                    | 224              | 255              | 278               | 57.91                                 | [15]      |
| CoFe LDH/MoS $_2$ /Ni $_3$ S $_2$ /NF              | 228              | 277              | -                 | 54.66                                 | [23]      |
| Ni(OH)S@CoFe-LDH/NF                                | -                | -                | 238               | 48.2                                  | [24]      |
| ZIF@CoFe-LDH NCs nanocage                          | -                | 278              | -                 | 50                                    | [17]      |
| CoFe-LDH@MnCo-CH nanosheet                         | 250              | 276              | 290               | 50.0                                  | [36]      |
| CoFe LDH/Co $_2$ Fe $_2$ O $_4$ nanosheet          | 162              | -                | 400               | 85.6                                  | [39]      |
| Co-LDH@ZIF-67 nanosheet                            | 187              | -                | 290               | 59                                    | [31]      |
| CoFe-LDH/GF nanowire                               | 252              | -                | 285               | 61                                    | [51]      |
| CoFe-LDH@MnCo-CH nanowire                          | 250              | -                | -                 | 50.0                                  | [55]      |
| CoFe-LDH                                           | -                | -                | 360               | 38.6                                  | [34]      |
| Ce $_{0.2}$ CoFe-LDH                               | 227              | -                | 310               | 48.30                                 | [40]      |
| CoFe/a-NiFe LDH                                    | -                | -                | 265               | 38.8                                  | [8]       |
| $\text{Co}_2(\text{OH})_2\text{CO}_3$ @CoFe-LDH/NF | 104              | 203.5            | 267.2             | 57.6                                  | This work |

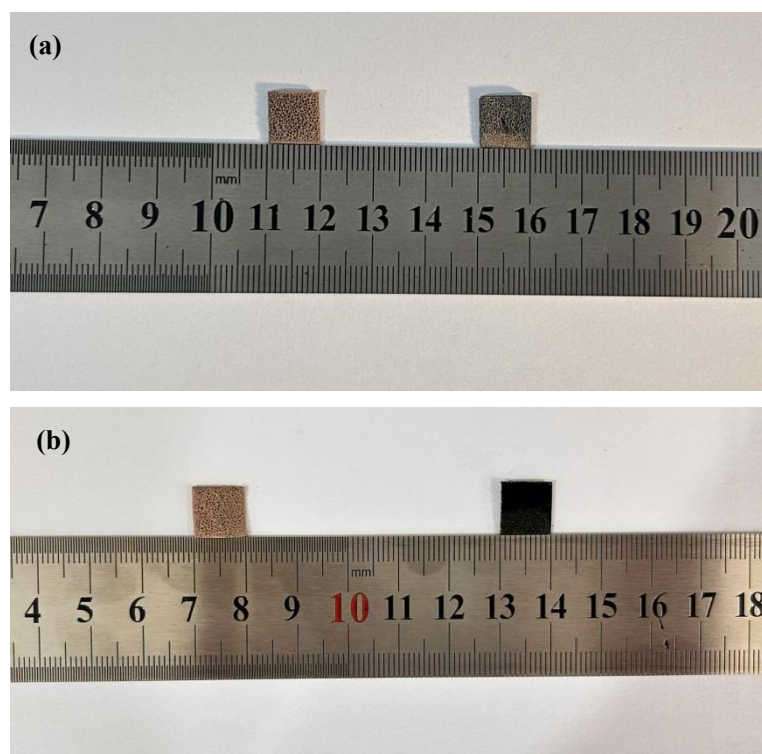

**Supplementary Fig. 7** (a) Digital photograph of  $\text{Co}_2(\text{OH})_2\text{CO}_3@\text{CoFe-LDH/NF}$  unreacted samples and LSV reaction tests, (b) Digital photograph of  $\text{Co}_2(\text{OH})_2\text{CO}_3@\text{CoFe-LDH/NF}$  unreacted samples and stability tests.
